# Supplementary material for: Identification, characterization and expression analysis of lineage-specific genes within sweet orange (Citrus sinensis)
Source: PubMed Central journal article supplement (PMC4657247; doi:10.1186/s12864-015-2211-z), 2015-11-23

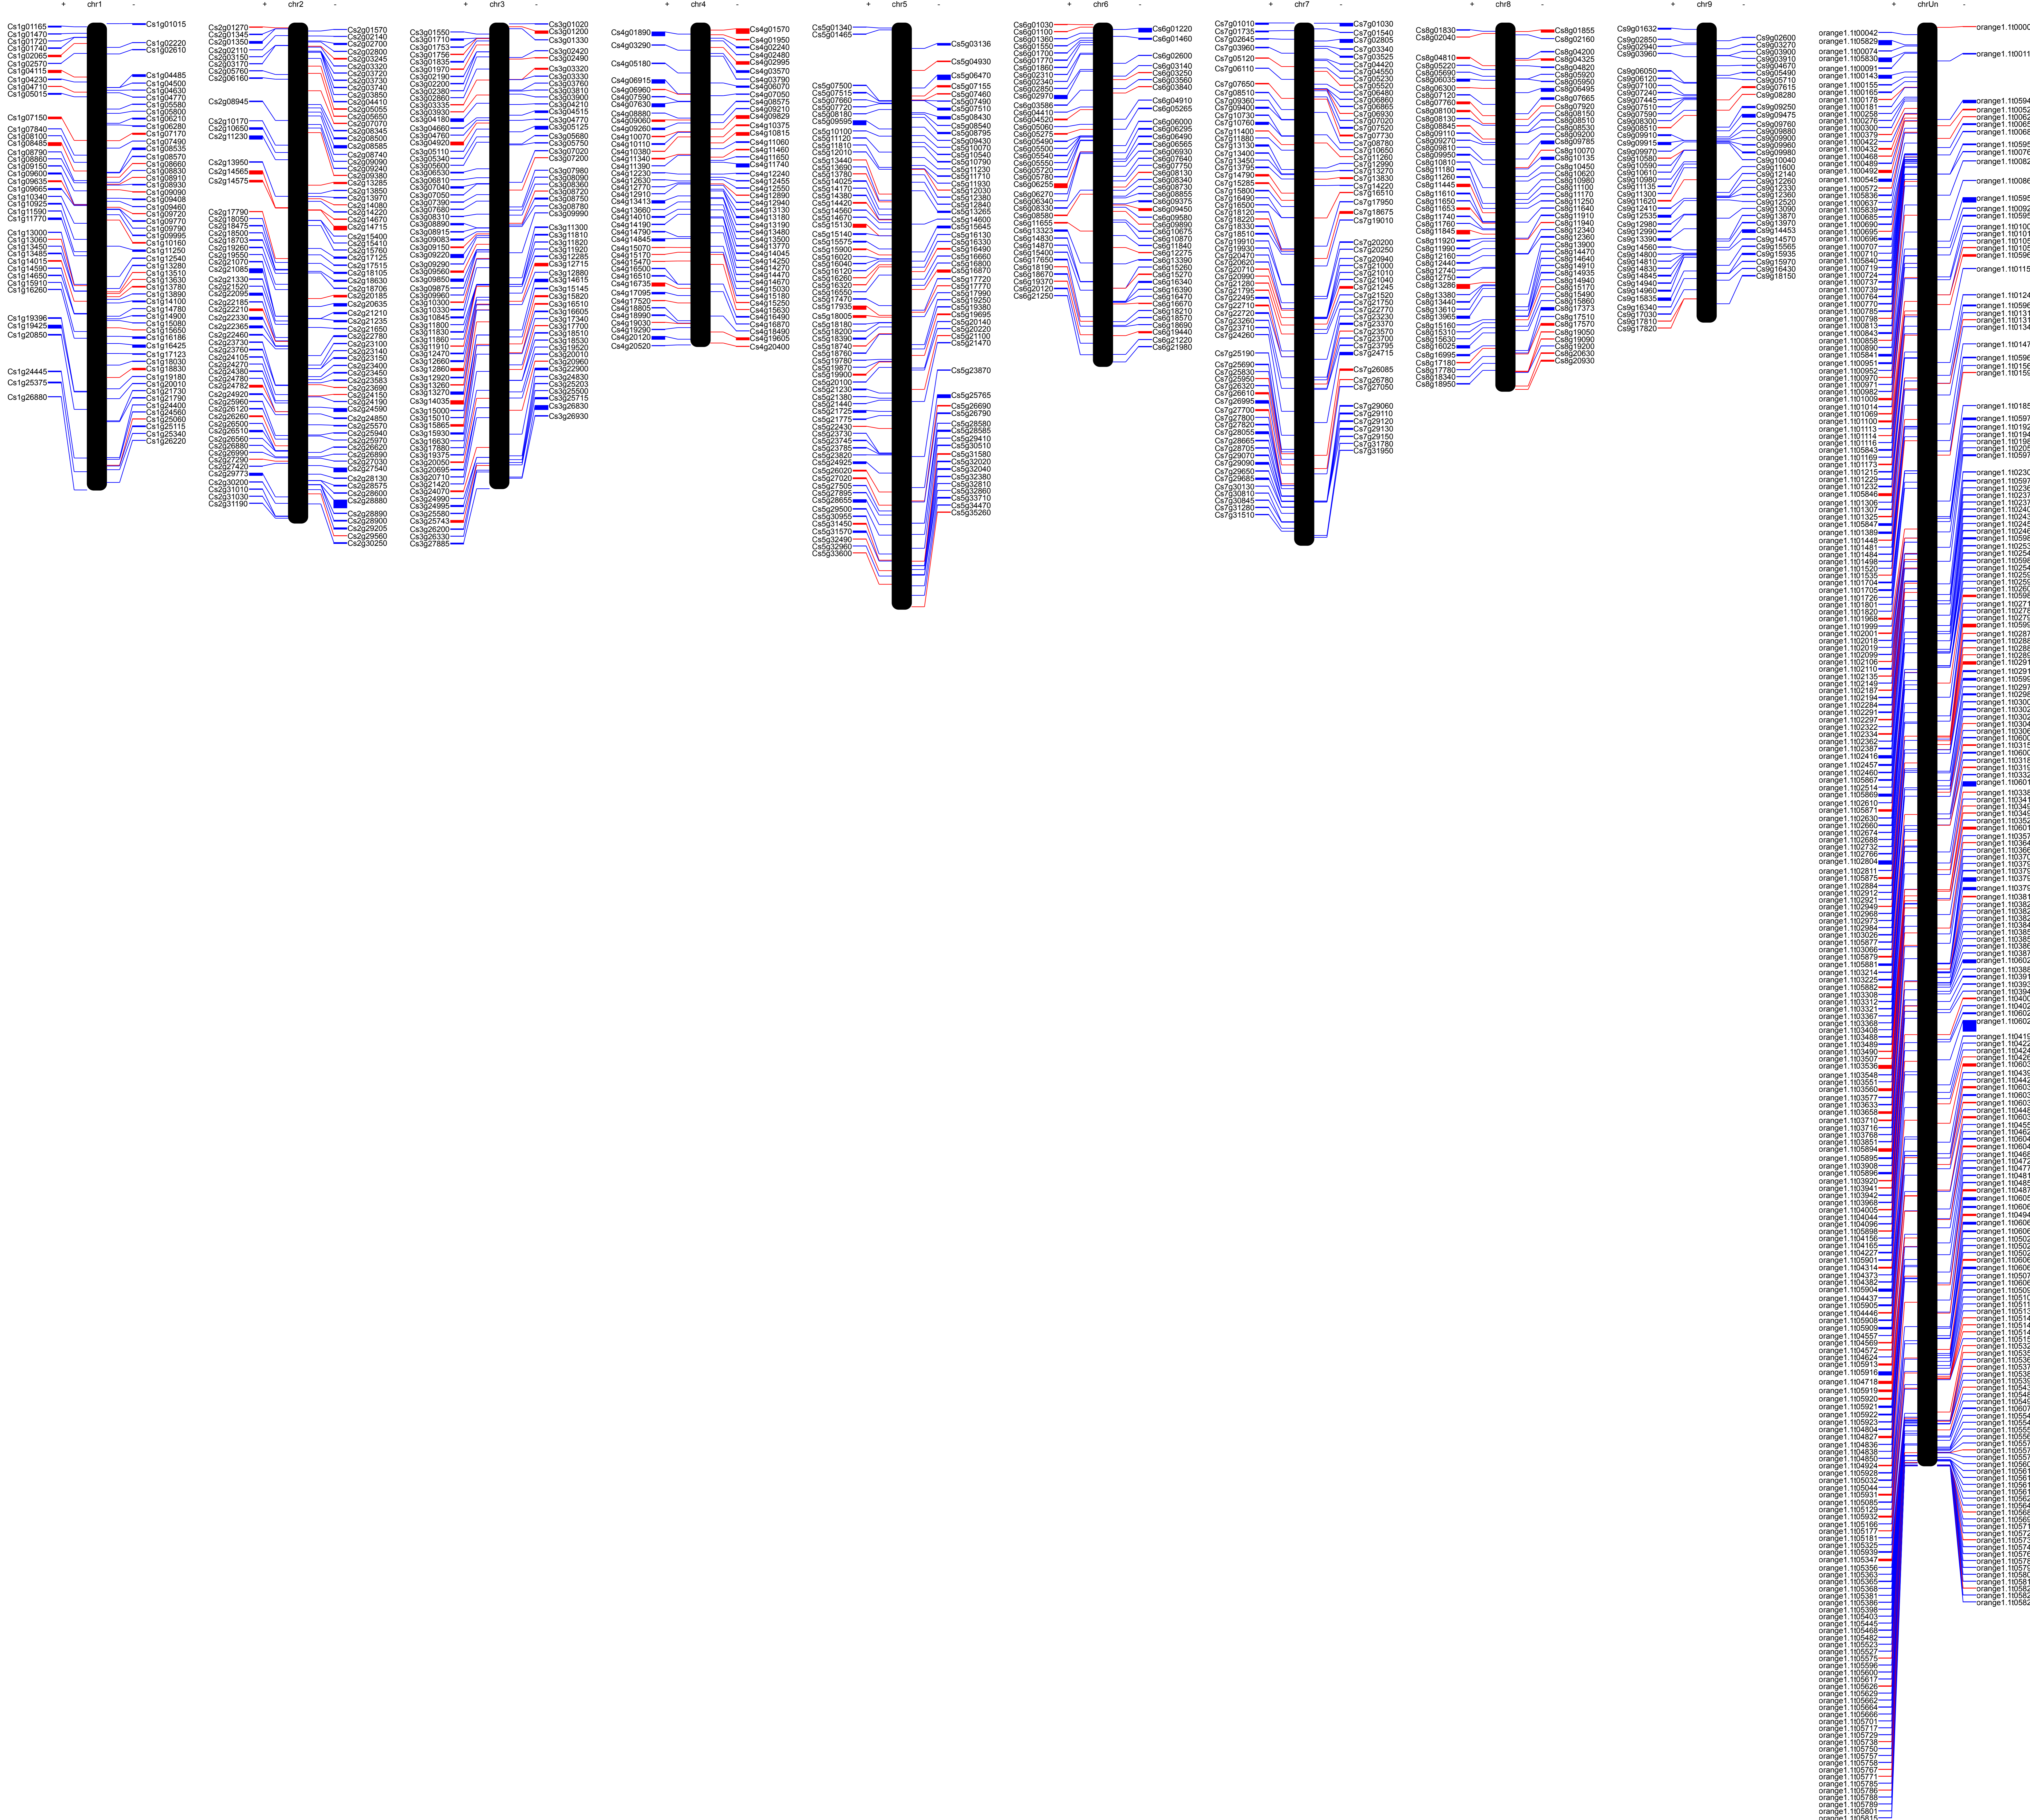

Supplement: 12864_2015_2211_MOESM4_ESM.pdf [file 12864_2015_2211_MOESM4_ESM.pdf]
